# Supplementary material
Source: PubMed Central journal article supplement (PMC10103284)
Supplement: jasn-34-505-s001.pdf [file jasn-34-505-s001.pdf]

## **Supplemental Table of Contents:**

Supplemental Figure 1 | Flow chart diagram showing patient flow through the study.

Supplemental Figure 2 | Kidney survival according to the initial need for renal replacement therapy.

Supplemental Figure 3a | Recovery of kidney function according to the Renal Risk Score.

Supplemental Figure 3b | Recovery of kidney function according to the percentage of normal glomeruli in the kidney biopsy.

Supplemental Tables:

Supplemental Table 1 Therapeutic intervention

Supplemental Table 2a Univariable models for time of ESKD

Supplementary Table 2b Multivariable models for time of ESKD in the sub-cohort of patients with creatinine at presentation

Supplemental Table 2c Univariable models for time to recovery

Supplemental Table 3a Clinical Outcome based on Percentage of Normal Glomeruli

Supplemental Table 3b Clinical Outcome based on Percentage of Normal Glomeruli in Patients with less than 10% Normal Glomeruli

## SUPPLEMENTAL FIGURES

### Supplemental Figure 1 | Flow chart diagram

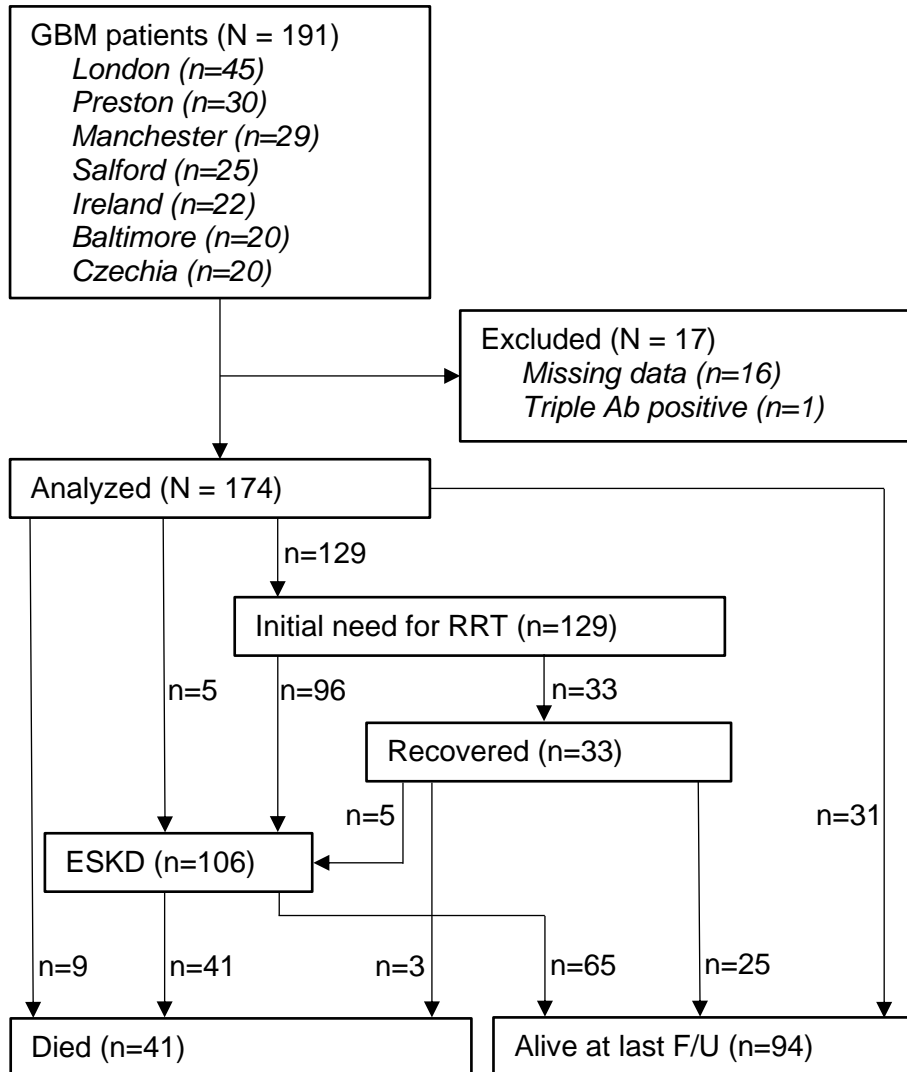

## Supplemental Figure 2

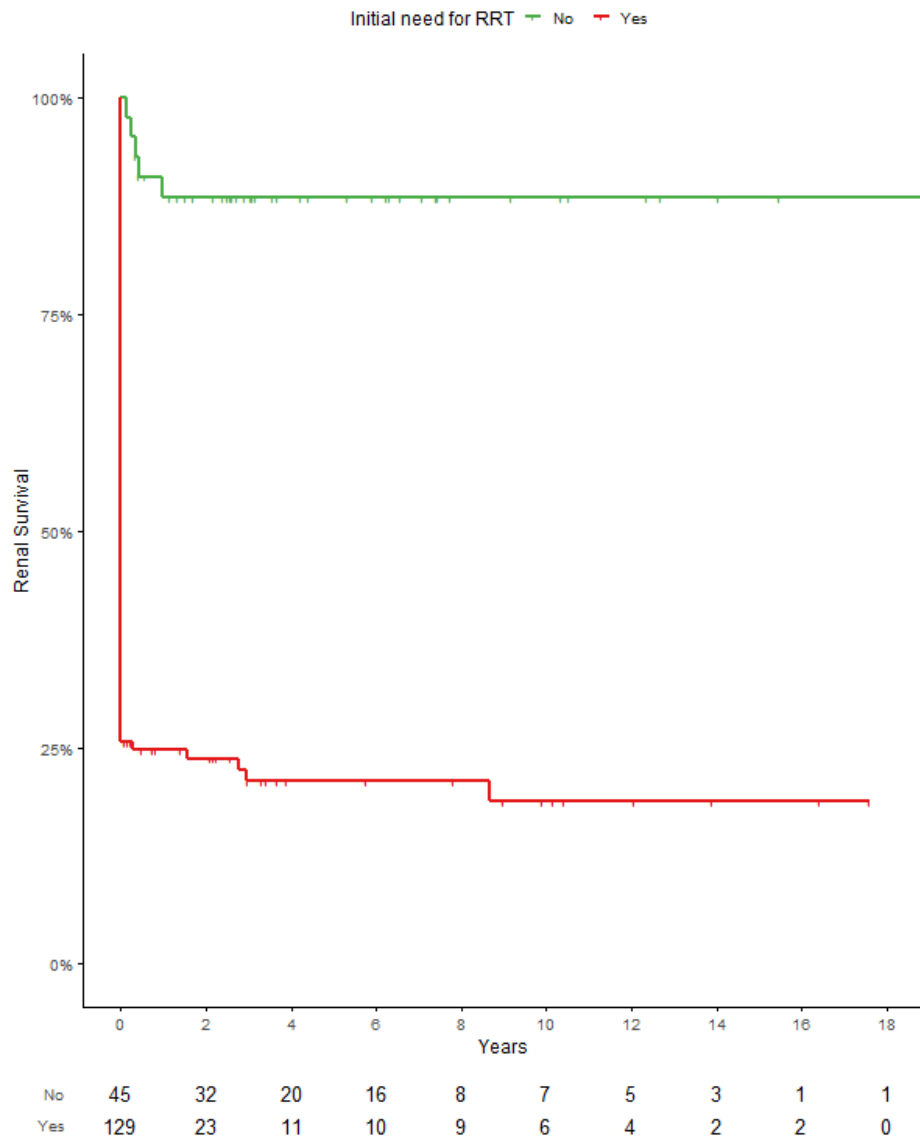

**Supplemental Figure 2 | Kidney survival according to the initial need for renal replacement therapy.** Kaplan-Meier curve demonstrating the development of end stage kidney disease (ESKD) of patients with anti-glomerular basement membrane (GBM) disease. ESKD differs between the two patient groups,  $C=0.767$ ,  $P<0.001$ .

### Supplemental Figure 3a

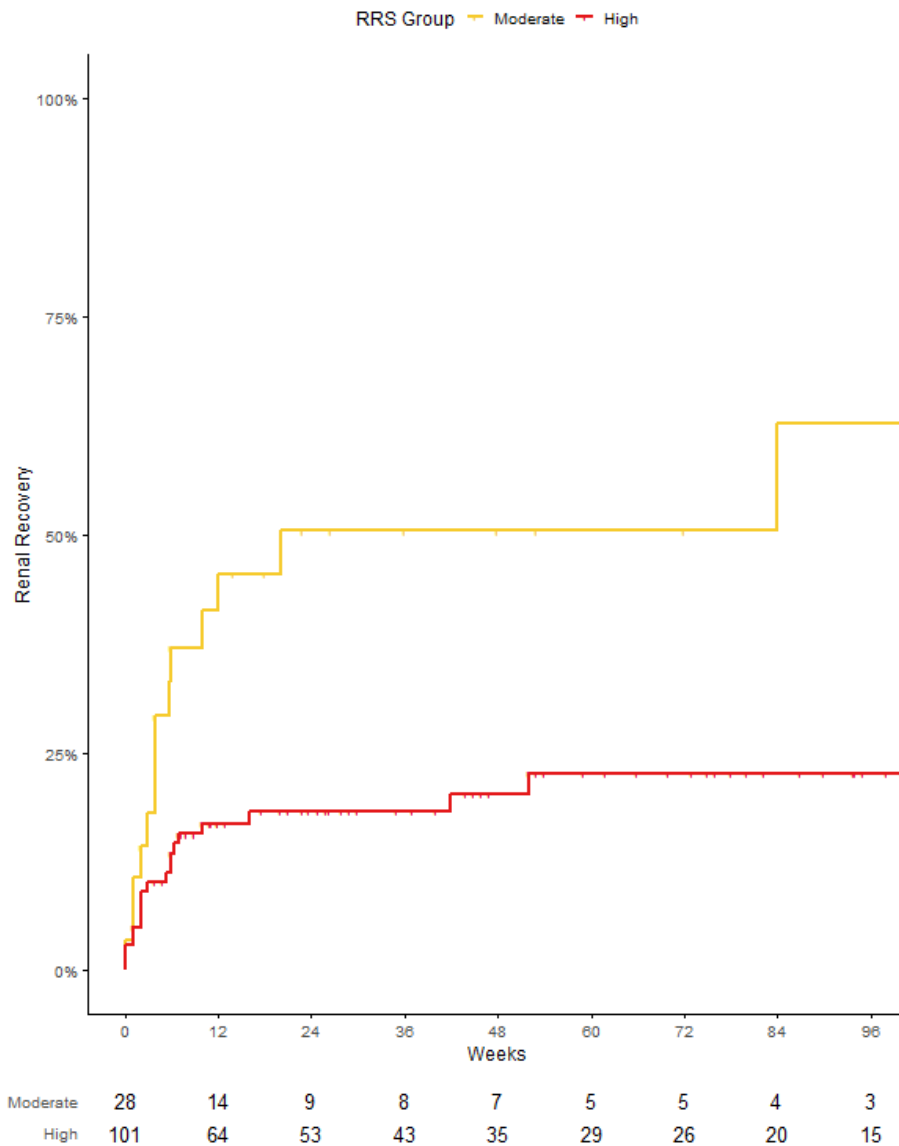

**Supplemental Figure 3a | Recovery of kidney function according to the Renal Risk Score.** Kaplan-Meier curve demonstrating renal recovery of patients with anti-glomerular basement membrane (GBM) disease and initially requiring renal replacement therapy (RRT) according to their Renal Risk Score (RRS) group (low, 0 points; moderate, 2–7 points; high, 8–11 points). Patients in the moderate risk group recovered kidney function more often compared to patients in the high risk group,  $C=0.644$ ,  $P<0.001$ .

### Supplemental Figure 3b

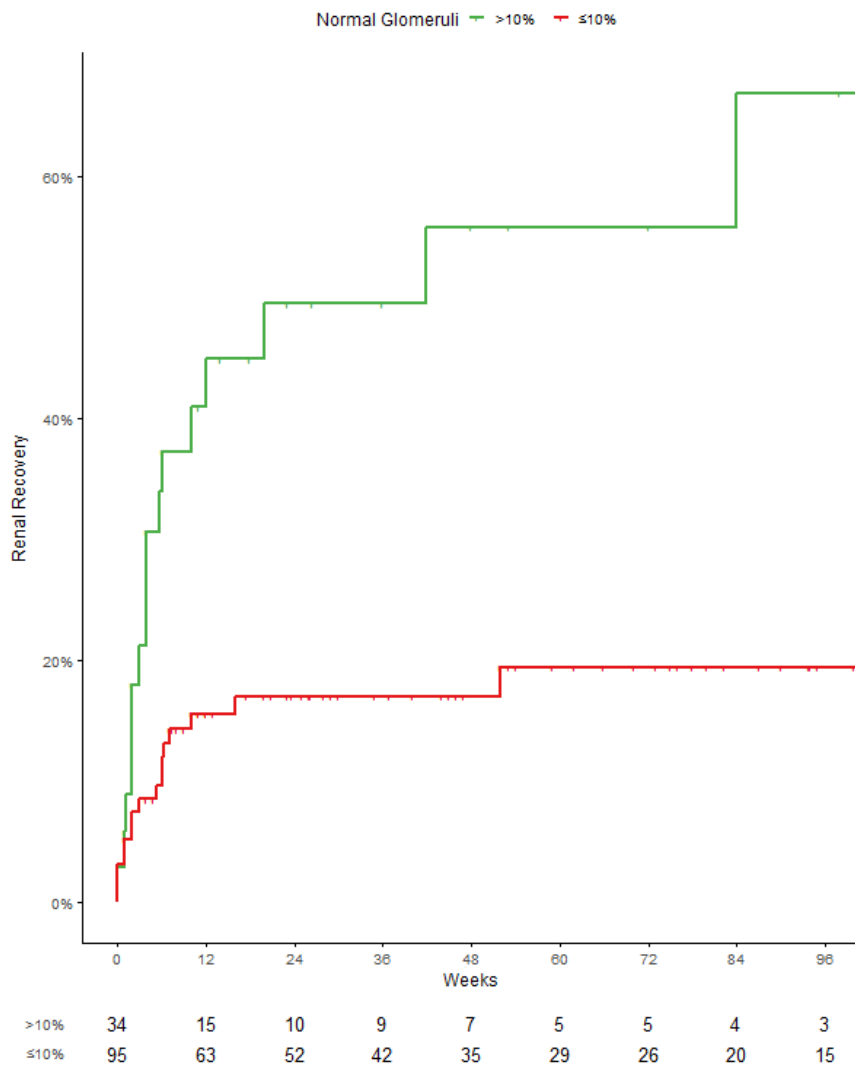

**Supplemental Figure 3b | Recovery of kidney function according to the percentage of normal glomeruli in the kidney biopsy.** Kaplan-Meier curve demonstrating renal recovery of patients with anti-glomerular basement membrane (GBM) disease and initially requiring renal replacement therapy grouped by the percentage normal glomeruli on their biopsy (Normal  $\geq 10\%$ , Normal  $< 10\%$ ). Patients with more than 10% normal glomeruli in the biopsy recovered renal function more often compared to patients with a lower percentage of normal glomeruli than 10%, Harrell's  $C=0.622$ ,  $P<0.001$ .

## SUPPLEMENTARY TABLES

**Supplementary Table 1 | Therapeutic Intervention**

| Therapies        | Patients (N=174) |
|------------------|------------------|
| All Therapies    | 131 (75.3%)      |
| Glucocorticoids  | 156 (89.7%)      |
| Cyclophosphamide | 146 (83.9%)      |
| Plasma Exchange  | 143 (82.2%)      |
| No Therapies     | 7 (4.0%)         |

All therapies, patients receiving glucocorticoids, cyclophosphamide, and plasma exchange; no therapies, patients who did not receive any therapeutic intervention.

**Supplementary Table 2a | Univariable models for time to ESKD**

|                                           | HR (95% CI)           | C     | P Value |
|-------------------------------------------|-----------------------|-------|---------|
| Ab (Mono Anti-GBM, Double Positive Ab)    | 0.870 (0.653 - 1.153) | 0.538 | 0.333   |
| Female Sex                                | 0.893 (0.681 - 1.170) | 0.530 | 0.412   |
| Age at diagnosis                          | 1.013 (1.002 - 1.025) | 0.588 | 0.024   |
| eGFR                                      | 0.897 (0.857 - 0.939) | 0.772 | <0.001  |
| Normal Glomeruli                          | 0.953 (0.936 - 0.971) | 0.718 | <0.001  |
| Tubular Atrophy and Interstitial Fibrosis | 1.216 (0.808 - 1.828) | 0.523 | 0.348   |
| Initial need for RRT                      | 14.05 (5.700 - 34.64) | 0.767 | <0.001  |
| RRS                                       | 1.326 (1.207 - 1.456) | 0.760 | <0.001  |

Ab, antibody; C, Harrell's Concordance; double positive Ab, antibodies for anti-glomerular basement membrane (GBM) and antineutrophil cytoplasmic (ANCA) antibodies; C, Harrell's Concordance; eGFR, estimated glomerular filtration rate; ESKD, end stage kidney disease; HR, Hazard ratio; 95% CI, 95% confidence interval; mono anti-GBM, anti-GBM antibodies without additional ANCA antibodies; RRS, Renal Risk Score comprised of estimated glomerular filtration rate (G0>15 ml/min/1.73 m<sup>2</sup>, G1≤15 ml/min/1.73 m<sup>2</sup>), percentage of normal glomeruli in the kidney biopsy (N0>25%, N1=10-25%, N2<10%), tubular atrophy and interstitial fibrosis (T0 ≤ mild to moderate, T1 ≥ moderate), with points assigned (G1=3, N1=4, N2=6, T1=2) and risk groups created (low 0, moderate 2 - 7, and high risk group 8 – 11 points); RRT, renal replacement therapy.

**Supplementary Table 2b | Multivariable models for time to ESKD in sub-cohort of patients with serum creatinine at presentation (n=119)**

| Variable                                  | $\beta$ Coefficient | HR (95% CI)          | <i>P</i> Value |
|-------------------------------------------|---------------------|----------------------|----------------|
| Ab (Mono Anti-GBM, Double Positive Ab)    | -0.281              | 0.755 (0.509-1.121)  | 0.163          |
| Female Sex                                | -0.078              | 0.925 (0.629-1.360)  | 0.691          |
| Age at diagnosis                          | 0.006               | 1.006 (0.990-1.022)  | 0.448          |
| eGFR                                      | -0.029              | 0.971 (0.887-1.063)  | 0.528          |
| Serum creatinine                          | -0.017              | 0.983 (0.398-2.431)  | 0.971          |
| Normal Glomeruli                          | -0.078              | 0.963 (0.937-0.989)  | 0.006          |
| Tubular Atrophy and Interstitial Fibrosis | 0.386               | 0.1472 (0.709-3.058) | 0.300          |
| RRT at time of diagnosis                  | 1.603               | 4.969 (1.675-14.74)  | 0.004          |

Ab, antibody; double positive Ab, antibodies for anti-glomerular basement membrane (GBM) and antineutrophil cytoplasmic (ANCA) antibodies; eGFR, estimated glomerular filtration rate; ESKD, end stage kidney disease; HR, Hazard ratio; 95% CI, 95% confidence interval; RRT, renal replacement therapy.



**Supplementary Table 2c | Univariable models for time to recovery**

|                                           | HR (95% CI)           | C     | P Value |
|-------------------------------------------|-----------------------|-------|---------|
| Ab (Mono Anti-GBM, Double Positive Ab)    | 1.520 (0.938 - 2.466) | 0.579 | 0.09    |
| Female Sex                                | 1.464 (0.852 - 2.519) | 0.539 | 0.168   |
| Age at diagnosis                          | 1.004 (0.984 - 1.025) | 0.529 | 0.686   |
| eGFR                                      | 1.036 (0.969 - 1.107) | 0.593 | 0.297   |
| Normal Glomeruli                          | 1.045 (1.020 - 1.071) | 0.622 | <0.001  |
| Tubular Atrophy and Interstitial Fibrosis | 0.862 (0.291 – 2.549) | 0.522 | 0.799   |
| RRS                                       | 0.794 (0.693-0.910)   | 0.644 | <0.001  |

Ab, antibody; C, Harrell's Concordance; double positive Ab, antibodies for anti-glomerular basement membrane (GBM) and antineutrophil cytoplasmic (ANCA) antibodies; eGFR, estimated glomerular filtration rate; ESKD, end stage kidney disease; HR, Hazard ratio; 95% CI, 95% confidence interval; mono anti-GBM, anti-GBM antibodies without additional ANCA antibodies; RRS, Renal Risk Score comprised of estimated glomerular filtration rate (G0>15 ml/min/1.73 m<sup>2</sup>, G1≤15 ml/min/1.73 m<sup>2</sup>), percentage of normal glomeruli in the kidney biopsy (N0>25%, N1=10-25%, N2<10%), tubular atrophy and interstitial fibrosis (T0 ≤ mild to moderate, T1 ≥ moderate), with points assigned (G1=3, N1=4, N2=6, T1=2) and risk groups created (low 0, moderate 2 - 7, and high risk group 8 – 11 points).

**Supplementary Table 3a | Clinical Outcome based on Percentage of Normal Glomeruli**

|                                               | N0<br>(n=33)    | N1<br>(n=30)    | N2<br>(n=111)    |
|-----------------------------------------------|-----------------|-----------------|------------------|
| Glomeruli on biopsy (Median (IQR))            | 15.0 (8.0-21.0) | 15.0 (9.0-19.8) | 17.0 (11.0-25.0) |
| eGFR (Median ml/min/1.73m <sup>2</sup> (IQR)) | 17.0 (8.0-34.0) | 6.0 (5.0-9.0)   | 6.0 (4.0-9.0)    |
| Initial need for RRT                          | 11 (33.3%)      | 23 (76.7%)      | 95 (85.6%)       |
| Renal Recovery                                | 6/11 (54.5%)    | 11/23 (47.8%)   | 16/95 (16.8%)    |
| ESKD                                          | 5 (15.2%)       | 16 (53.3%)      | 85 (76.6%)       |
| Mortality                                     | 5 (15.2%)       | 11 (36.7%)      | 37 (33.3%)       |

eGFR, estimated glomerular filtration rate; ESKD, end stage kidney disease; IQR, interquartile range; N0>25% normal glomeruli; N1=10-25% normal glomeruli; N2<10% normal glomeruli; RRT, renal replacement therapy.

**Supplementary Table 3b | Clinical Outcome based on Percentage of Normal Glomeruli in Patients with less than 10% Normal Glomeruli**

| Normal Glomeruli                              | >0%<br>(n=22)    | 0%<br>(n=89)     |
|-----------------------------------------------|------------------|------------------|
| Glomeruli on biopsy (Median (IQR))            | 25.5 (21.0-34.0) | 14.0 (10.0-22.0) |
| eGFR (Median ml/min/1.73m <sup>2</sup> (IQR)) | 5.0 (4.0-9.0)    | 6.0 (4.0-9.8)    |
| Initial need for RRT                          | 20 (90.9%)       | 75 (84.3%)       |
| Renal Recovery                                | 3/20 (15.0%)     | 13/75 (17.3%)    |
| ESKD                                          | 17 (77.3%)       | 68 (76.4%)       |
| Mortality                                     | 7 (31.8%)        | 30 (33.7%)       |

eGFR, estimated glomerular filtration rate; ESKD, end stage kidney disease; IQR, interquartile range; RRT, renal replacement therapy.
